# Supplementary material
Source: PubMed Central journal article supplement (PMC8346205)

**Regiodivergent Biocatalytic Hydroxylation of L-Glutamine Facilitated by Characterization  
of Non-Heme Dioxygenases from Non-Ribosomal Peptide Biosyntheses**

Hans Renata\*, Emily Shimizu, Christian R. Zwick, III

The Scripps Research Institute, Department of Chemistry, 130 Scripps Way, Jupiter, FL 33458,

USA

**SUPPLEMENTARY MATERIAL**

**Table of Contents**

|                                                                |      |     |
|----------------------------------------------------------------|------|-----|
| General materials and methods.....                             | page | S2  |
| Protein and DNA sequences .....                                | page | S3  |
| General procedure for amino acid purification.....             | page | S4  |
| General procedure for enzyme expression and purification ..... | page | S4  |
| Total turnover number (TTN) measurements .....                 | page | S5  |
| Characterization of 3-OH-Gln product from GloE reaction.....   | page | S5  |
| Determination of Michaelis-Menten parameters .....             | page | S6  |
| Figure S1 .....                                                | page | S6  |
| Synthetic procedure .....                                      | page | S7  |
| Figure S2.....                                                 | page | S12 |
| References.....                                                | page | S12 |
| Spectral data.....                                             | page | S13 |

### ***General materials and methods***

Unless otherwise noted, all chemicals and reagents for chemical reactions were purchased at the highest commercial quality and used without further purification. Reactions were monitored by thin layer chromatography (TLC) and liquid chromatography/mass spectrometry (LC/MS). TLC was performed with 0.25 mm E. Merck silica plates (60F-254) using short-wave UV light as the visualizing agent, and ninhydrin, KMnO<sub>4</sub>, or phosphomolybdic acid and heat as developing agents. LC/MS was performed with Agilent 1260 Infinity System equipped with Poroshell 120 EC-C18 column (3.0 x 50 mm, 2.7 micron). C18 purification was performed with Biotage Isolera One equipped with Sfar C18 Duo column (60 g). NMR spectra were recorded on a Bruker spectrometer and calibrated using residual undeuterated solvent. Optical rotations were measured on Autopol IV polarimeter (Rudolph Research Analytical). Enzymes (DpnI, Q5 polymerase) were purchased from New England Biolabs (NEB, Ipswich, MA). pET28a(+)-Q4Ox and pET28a(+)-GloE expression vectors were obtained via DNA synthesis from Twist Bioscience and was used directly to transform electrocompetent *E. coli* strain BL21(DE3). Sonication was performed using a Qsonica Q500 sonicator. Purified enzymes were accessed via immobilized metal ion affinity chromatography with HisTrap HP column.

### *Protein and DNA sequences*

Protein sequence of Q4Ox (Uniprot ID: I1R9B5)

MASNFTSIPVLDYPSLSPSTKPAFLAELRDALVKVGFQVRDPPIPLKLQODALRLSAQFFDL  
PTEKKLDIENVHSKRFLGYSRINSESTASGTDYLESILLGPNLPELGPEEPVYLHLQGPSQWPD  
EVSVPGFRDVLESYHSQIQDFSIEFARLIAEALEMPDLDLTKLLGQPLFSRLKPTRYLPPSMNP  
AAEDGSHGIGPHKDIAFMTYLLQGGTHNCLEVQNKLGHWVPVPPVPGALVVNIGRLLLEVITGGV  
CVATTHRVLKRQGFVDGDGKSLGPRI SLFFFQFVNPRLTVDDVLVDVPHHIKDLVPDQVATTE  
AETFFSGLFNNCIGDNI FVNHLTTYPRVGRWYPDLMQLASEKQAESKRLDEQRATEGHI

DNA sequence of FGSG\_00048

ATGGCGTCGAAC TTTACATCTATCCCGGTTCTGGACTATCCCTCTTCGTTGTCGCCTTCAACAA  
AACCCGCCTTTTTGGCCGAGTTACGTGACGCGTTAGTCAAGGTTGGCTTTTTCCAGGTTGCGGA  
TCCCCCTATCCCTTGA AATTACAGCAAGATGCATTGCGCCTTTCTGCACAATTTTTCGACCTT  
CCTACGGAGAAGAAGTTAGATATTTGAGAACGTACACAGCAAACGTTTCCTTGGGTACTCCCGTA  
TCAACAGTGAATCAACGGCGTCTGGGACTGACTACTTGGAAAGCATTCTGTTGGGACCGAATTT  
ACCAGAGCTTGGTCCCGAGGAACCCGTCTACTTGCATCTTCAGGGGCCCTCACAAATGGCCTGAC  
GAGGTGTCGGTTCCCGGGTTTCGTGATGTGCTT GAGTCGTATCACAGCCAGATCCAGGACTTCT  
CCATTGAGTTCGCCCGTCTGATTGCCGAGGCGTTGGAGATGCCATTGGACACCCTGACAAAAT  
GCTTGGGCAGCCATTGTTTTCTCGCTTAAAGCCAACACGTTATTTACCCCTTCTATGAATCCC  
GCCGCAGAAGACGGATCACACGGCATCGGCCCCACAAAGATATTGCCTTCATGACCTACCTTT  
TACAGGGCGGGACACATAACTGCTTGGAAGTACAAAATAAACTGGGCCATTGGGTCCCGGTTCC  
CCCAGTCCCGGGAGCTCTGGTTGTCAATATCGGCCGTCTTTTAGAGGTAATCACAGGGCGGGGTA  
TGTGTGGCGACTACACATCGCGTCATTTTGAAACGTCAAGGATTTGTAGATGGAGATGGAAAAT  
CTCTTGGACCCCGCATCTCGCTGCCTTTCTTT CAGTTCGTAAATCCCCGCCTGACAGTTGATGA  
TGTGTTGGTTGATGTACCACATCATATTAAGGATCTTGTACCGGACCAAGTTGCAACAACGGAG  
GCTGAAACCTTCTTCAGTGGGTTATTCAACAAC TGCATTTGGAGACAACATTTTCGTCAACCATT  
TAACCACGTATCCCCGTGTTGGTAAGCGCTGGTACCCAGATTTAATGCAACTGGCTTCGGAAAA  
GCAGGCTGAGAGTAAACGTCTGGATGAGCAGCGCCGTGCCACCGAGGGACACATTTGA

Protein sequence of GloE (Uniprot ID: I1R9B5)

MDYIKQAESTQLSSLSLSRLEGNNAEESKRLLEACAQDGFYLDLRDHKQLLV DYEALLEI IKQ  
YFNEPLDQMKDDRKSDTIGYEPVATSAGVLDGLPDYYESFKVSWNQLRDHVQELPTVVETNIE  
VFDRFAKYVHSILLMILSRLSQT MGRNNDNRFESYHRDSIATRNLTLFLKYPKQDTTEHG VGHN  
KHTDVGTLTFLLSGQRGLQRLTPEGWCHVEPRSGFAVVNVGDSLRFSLSDCVLSSVIHRVLPVGA  
HQTEDRYTLAYFLRPEDDAVFKDINGNLVSARS WHDRKFDHFRASHNQKNDTILMGGMEENQK  
FLQYKFQA

DNA sequence of GloE

ATGGATTACATTAAACAGGCTGAATCTACCCAGCTGTCTTCTCTGAGCTTGTCTCGCTTGGAAAG  
GAAATAACGCCGAAGAGTCAAACGCTTTTTGGAAGCCTGCGCTCAGGACGGCTTCTTCTATTT  
GGACTTACGTGACCATAAACAGTTACTGGTTGACTATGAAGCCTTGTCTGGAATCATCAAGCAA  
TACTTCAACGAACCTCTGGACCAAAGATGAAGGACGATCGTAAGAGTGATACGATCGGCTATG  
AGCCGGTAGCGACCAGTGCTGGGGTCTTGATGGTCTGCCTGACTACTATGAGTCGTTAAGGT  
TAGTTGGAACCAGTTGCGTGACCATGTTCAAGAGCTGCCAACTGTGGTTGAAACTAATATCGAA  
GTATTCGACCGTTTTGCGAAGTACGTTACAGTATCTTATTGATGATCCTGTCCCGTCTGTCCAC  
AAACAATGGGGCGTAATAATGATAATCGTTTCGAGTCATACCATCGTGATTTCGATCGCTACTCG

TACAAACTTGACCTTTCTTAAGTATCCCAAGCAAGACACGACTGAACATGGAGTTGGTCACAAT  
AAACATACAGATGTAGGCACACTTACTTTTTTACTTAGTGGGCAGCGCGGATTGCAACGCTTGA  
CACCAGAAGGGTGGTGCCATGTGGAGCCTCGTTCGGCTTCGCGGTAGTGAACGTAGGGGATAG  
CTTGCGCTTCCTTTCTGATTGTGTGTTGAGTTCGGTTATTCACCGTGTGTTACCAGTTGGAGCG  
CACCAAACCGAAGATCGCTATACGTTAGCTTACTTTCTTCGTCCAGAAGACGACGCCGTTTTTA  
AGGACATCAATGGTAACCTGGTGTCCGCGCGCAGTTGGCACGACCGCAAATTCGACCATTTCCG  
CGCTAGTCACAATCAACAGAAGAATGATACCATTTCTTATGGGGGGTATGGAGGAGAACCAGAAA  
TTCTTACAATACAAGTTTCAAGCCTGA

For the construction of expression vector, each of the above sequences was inserted between the NdeI and BamHI restriction sites within the commercial pET28a(+) vector. The resulting expression vector was used directly to transform electrocompetent *E. coli* strain BL21(DE3). Variants were stored as glycerol stocks at  $-80\text{ }^{\circ}\text{C}$ .

#### ***General procedure for amino acid purification with Dowex 50WX8 cation exchange resin***

Dowex 50WX8 resin (20 mg/1  $\mu\text{mol}$  of amino acid) was slurry-packed with 1 M  $\text{NH}_4\text{OH}$  in a flash chromatography column, and then washed with  $\sim 1$  column volume (CV) of 1 M  $\text{NH}_4\text{OH}$ , and then  $\sim 2$  CV of  $\text{H}_2\text{O}$ . Next, the resin was washed with 1 M  $\text{HCl}$  until  $\text{pH} = 1$ , and then with  $\text{H}_2\text{O}$  until  $\text{pH} = 6-7$ . The acidified crude reaction mixture was loaded directly onto the column, washing with  $\text{H}_2\text{O}$  until  $\text{pH} = 7$ , and with 1 M  $\text{NH}_4\text{OH}$  until product was no longer eluting from the column. Amino acid containing fractions were pooled, concentrated *in vacuo*.

#### ***General procedure for enzyme expression and purification***

2 x 250 mL  $\text{TB}_{\text{kan}}$  was inoculated with an overnight culture (1 mL,  $\text{LB}_{\text{kan}}$ ) of recombinant *E. coli* BL21(DE3) cells harboring a pET28a(+) plasmid encoding the appropriate enzyme (Q4Ox or GloE). The cultures were shaken at 250 rpm at  $37\text{ }^{\circ}\text{C}$  for roughly 2.5 h or until an optical density of 0.7–1.0 was reached. Cultures were cooled on ice for 20 min and then induced by adding IPTG to a final concentration of 25  $\mu\text{M}$ . The cultures were allowed to continue for another 20 hours at  $20\text{ }^{\circ}\text{C}$  and shaking at 250 rpm. Cell were harvested by centrifugation ( $4\text{ }^{\circ}\text{C}$ , 15 min, 3,000xg), and the cell pellet was stored at  $-20\text{ }^{\circ}\text{C}$  or below for at least 2 h. Purification was performed with an AKTA pure FPLC system (GE Healthcare). The thawed cell pellet was resuspended in Ni-NTA buffer A (25 mM Tris•HCl, 200 mM NaCl, 25 mM imidazole,  $\text{pH} 9.0$ , 4 mL/g of cell wet weight) and lysed by sonication (3x1 min, 50% duty cycle). The lysate was centrifuged at 15,000xg for 30 min at  $4\text{ }^{\circ}\text{C}$  to remove cell debris. The collected supernatant was subjected to a Ni-NTA

chromatography step using a Ni Sepharose column (HisTrap-HP, GE healthcare, Piscataway, NJ). The protein was eluted from the Ni Sepharose column using 25 mM Tris•HCl, 200 mM NaCl, 300 mM imidazole, pH 8.0. Ni-purified protein was buffer exchanged into 0.05 M phosphate buffer (pH = 8.0) using a 30 kDa MW cut-off centrifugal filter. Protein concentrations were determined by A280 with calculated extinction coefficients as obtained at <https://web.expasy.org/protparam>. For storage, proteins were portioned into 100  $\mu$ L aliquots, flash frozen on liquid N<sub>2</sub>, and stored at -80 °C.

### ***Total turnover number (TTN) measurements***

A 20 ml scintillation vial was charged with the appropriate amino acid (80  $\mu$ mol, 1.0 equiv, 20 mM final concentration), L-ascorbic acid (40  $\mu$ mol, 0.50 equiv, 10 mM final concentration), and  $\alpha$ -ketoglutaric acid (disodium salt dihydrate, 200  $\mu$ mol, 2.5 equiv, 50 mM final concentration). 50 mM KPi buffer was added to the vial (pH 8.0, 4.0 mL), followed by 40  $\mu$ L of FeSO<sub>4</sub> solution in H<sub>2</sub>O (200 mM, 0.10 equiv, 2 mM final concentration). The reaction was started by the addition of the appropriate enzyme stock solution (final concentration of Q4Ox = 2  $\mu$ M, 0.00010 equiv, final concentration of GloE = 0.40 mM, 0.02 equiv) and shaken for 12 h at 20 °C, 250 rpm under air. After quenching with 1.0 mL of 1 M HCl, the crude reaction mixture was centrifuged (4,000 rpm, 5 min) and the supernatant was submitted directly to ion exchange purification on Dowex 50WX8 resin. For Q4Ox, yield of hydroxylation product were determined using <sup>1</sup>H NMR analysis employing ethylene carbonate as an internal standard. TTN was calculated by dividing the percentage yield of hydroxylation product with the mol% loading of enzyme. For GloE, reaction conversion was determined using <sup>1</sup>H NMR analysis by obtaining the ratio of hydroxylated product: unreacted starting material.

### ***Characterization of 3-OH-Gln product from GloE reaction***

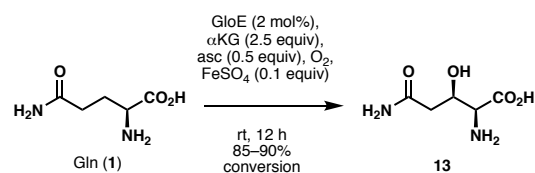

The above reaction with GloE provided ca. 1.0:0.15 ratio of **13**:1 based on <sup>1</sup>H NMR analysis after ion exchange purification on Dowex 50WX8 resin. This <sup>1</sup>H NMR spectrum was sufficiently clean

to allow identification and characterization of the C3 hydroxylated product, which matches spectral data previously reported in the literature.<sup>1,2</sup>

**<sup>1</sup>H NMR (400 MHz, Deuterium Oxide):**  $\delta$  4.35 – 4.27 (m, 1H), 3.45 (d,  $J = 4.8$  Hz, 1H), 2.58 (dd,  $J = 14.8, 3.9$  Hz, 1H), 2.50 (dd,  $J = 14.8, 9.5$  Hz, 1H).

### *Determination of Michaelis-Menten parameters of Gln hydroxylation with Q4Ox*

Kinetic parameters were determined by incubating 3  $\mu$ M Q4Ox with 25 mM  $\alpha$ KG, 25 mM L-ascorbic acid, 1 mM FeSO<sub>4</sub> and various concentrations of L-glutamine (0.50 mM to 4.0 mM) in 50 mM kPi buffer (pH 8.0, 2.5 mL total reaction volume). After 30 s, 1 min and 2 min interval, a 200  $\mu$ L aliquot of the reaction was sampled and quenched with 200  $\mu$ L of 50 mM Fmoc-OSu solution in MeCN and 100  $\mu$ L of sat. aq. NaHCO<sub>3</sub>. After 15 min of incubation, 100  $\mu$ L of 30 mM TsNH<sub>2</sub> was added as an internal standard for quantitation. The samples were centrifuged at 15,000 rpm for 3 min and analyzed by LCMS using the extracted ion chromatogram (EIC) mode, calibrating against standard curves made independently from Fmoc-derivatized product standards and TsNH<sub>2</sub>. Apparent kinetic parameters were calculated from a nonlinear fit of the initial velocity data to the Michaelis-Menten equation with the KaleidaGraph data analysis software (Synergy). The error bars in the plots represent the standard deviations calculated from replicate measurements and the errors for the fitted parameters are standard errors for the fits.

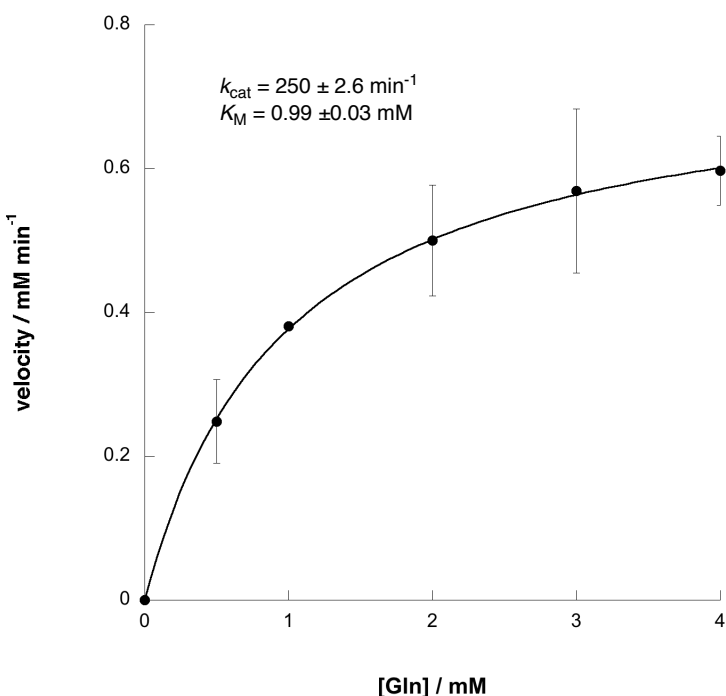

**Figure S1.** Michaelis-Menten plot of Gln hydroxylation with Q4Ox.

### *Synthetic procedure*

#### *Large-scale hydroxylation of glutamine with purified Q4Ox*

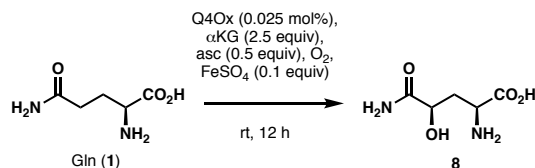

A 250 ml Erlenmeyer flask was charged with L-glutamine (105 mg, 0.72 mmol, 1.0 equiv, 20 mM final concentration), L-ascorbic acid (63 mg, 0.36 mmol, 0.50 equiv, 10 mM final concentration), and  $\alpha$ -ketoglutaric acid (disodium salt dihydrate, 407 mg, 1.80 mmol, 2.5 equiv, 50 mM final concentration) and  $FeSO_4$  (heptahydrate, 20 mg, 0.072 mmol, 0.1 equiv, 2 mM final concentration), followed by 50 mM KPi buffer (pH 8.0, 36 mL). The reaction was started by the addition of Q4Ox stock solution (final concentration = 5  $\mu$ M, 0.00025 equiv) and shaken for 12 h at 20  $^{\circ}C$ , 250 rpm under air. After quenching with 7.2 mL of 1 M HCl, the crude reaction mixture was centrifuged (4,000 rpm, 5 min). The supernatant was collected and following resuspension of the residual pellet in 20 mL of 0.2 M HCl, the crude suspension was centrifuged (4,000 rpm, 5 min) and the supernatant was collected. The combined supernatant was submitted directly to ion exchange purification on Dowex 50WX8 resin. Amino acid-containing fractions were combined, concentrated in vacuo and lyophilized to afford 99 mg of **8** as dark yellow powder which was determined to be >95% pure by  $^1H$  NMR analysis.

**$^1H$  NMR (400 MHz, Deuterium Oxide):**  $\delta$  4.29 (dd,  $J$  = 10.3, 3.5 Hz, 1H), 4.14 (dd,  $J$  = 6.8, 5.9 Hz, 1H), 2.37 (ddd,  $J$  = 15.0, 5.9, 3.4 Hz, 1H), 2.00 (ddd,  $J$  = 15.1, 10.4, 6.8 Hz, 1H).

**$^{13}C$  NMR (101 MHz, Deuterium Oxide):**  $\delta$  178.2, 171.1, 162.4 (q,  $J$  = 36.5 Hz), 115.9 (q,  $J$  = 290.5 Hz), 68.5, 50.8, 33.2.

$[\alpha]_D^{23} = +18.8^{\circ}$  ( $c$  = 0.5,  $H_2O$ )

**HRMS (ESI-TOF):** calcd for  $C_5H_{11}N_2O_4^+$  ( $[M+H]^+$ ) 163.0713, found 163.0744.

#### *Large-scale hydroxylation of glutamine with lysate of E. coli expressing Q4Ox*

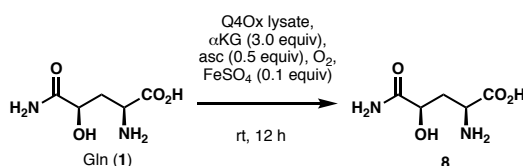

200 mL TB<sub>kan</sub> was inoculated with an overnight culture (1 mL, LB<sub>kan</sub>) of recombinant *E. coli* BL21(DE3) cells harboring a pET28a(+) plasmid encoding for Q4Ox. The cultures were shaken at 250 rpm at 37 °C for roughly 2.5 h or until an optical density of 0.7–1.0 was reached. Cultures were cooled on ice for 20 min and then induced by adding IPTG to a final concentration of 25 μM. The cultures were allowed to continue for another 20 hours at 20 °C and shaking at 250 rpm. Cells were harvested by centrifugation (4 °C, 15 min, 4,000xg) and resuspended in pH 8 KPi (50 mM) to a final OD<sub>600</sub> of 20. This procedure reliably produces ca. 70 mL of cell suspension. Cells were lysed by sonication (50% amplitude, 1 s on, 4 s off for 3 minutes) and the suspension was centrifuged (4 °C, 15 min, 4,000xg). A 250 mL Erlenmeyer flask was charged with Gln (204 mg, 1.40 mmol, 1.0 equiv, 20 mM final concentration), L-ascorbic acid (123 mg, 0.70 mmol, 0.50 equiv, 10 mM final concentration), α-ketoglutaric acid (disodium salt dihydrate, 949 mg, 4.20 mmol, 3.0 equiv, 60 mM final concentration) and FeSO<sub>4</sub> (heptahydrate, 39 mg, 0.14 mmol, 0.10 equiv, 2 mM final concentration), followed by 70 mL of clarified cell lysate. The reaction was left shaking at 250 rpm, 20 °C overnight. After quenching with 15 mL of 1 M HCl, the crude reaction mixture was centrifuged (4,000 rpm, 5 min). The supernatant was collected and following resuspension of the residual pellet in 20 mL of 0.2 M HCl, the crude suspension was centrifuged (4,000 rpm, 5 min) and the supernatant was collected. The combined supernatant was submitted directly to ion exchange purification on Dowex 50WX8 resin. Amino acid-containing fractions were combined, concentrated in vacuo and lyophilized to afford 174 mg of **8** as dark yellow powder which was determined to be >95% pure by <sup>1</sup>H NMR analysis.

### *Telescoped procedure for one-pot Fmoc protection of 4-OH-Gln*

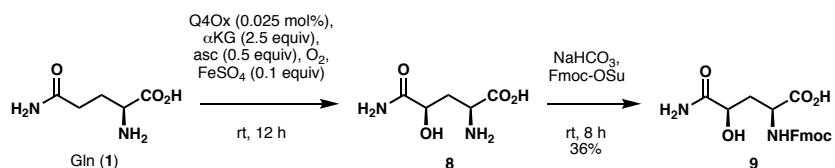

Large scale hydroxylation was performed following the above procedure with purified Q4Ox. After 12 h of shaking, 9 mL of sat aq. NaHCO<sub>3</sub> was added, followed by a solution of Fmoc-Osu (485 mg, 1.44 mmol, 2.0 equiv) in 36 mL of MeCN. The mixture was shaken for 8 h at room temperature and then charged with 30 mL of MeOH. The resulting mixture was centrifuged (4,000 rpm, 5 min) and the supernatant was collected. The residual pellet was resuspended in 1:1 mixture of MeCN:MeOH (30 mL). The resulting suspension was centrifuged (4,000 rpm, 5 min) and the



supernatant was collected. The combined supernatant was concentrated in vacuo until a residual volume of ~ 5 mL was obtained and then purified on a C18 reverse phase column (Biotage Sfär Duo, 60 g) with MeCN/H<sub>2</sub>O as the eluent system (1% MeCN/H<sub>2</sub>O to 100% MeCN over 10 CV) to afford 99 mg of **9** as an off-white solid.

**<sup>1</sup>H NMR (400 MHz, Methanol-*d*<sub>4</sub>):** δ 7.79 (dd, *J* = 7.5, 0.9 Hz, 2H), 7.68 (dd, *J* = 7.6, 2.9 Hz, 2H), 7.39 (td, *J* = 7.5, 1.1 Hz, 2H), 7.34 – 7.23 (m, 2H), 4.45 (t, *J* = 6.7 Hz, 1H), 4.33 (qd, *J* = 10.4, 7.1 Hz, 1H), 4.23 (t, *J* = 7.1 Hz, 1H), 4.19 (dd, *J* = 8.0, 4.5 Hz, 1H), 2.34 (ddd, *J* = 14.1, 6.6, 4.5 Hz, 1H), 2.01 (ddd, *J* = 14.5, 8.1, 6.9 Hz, 1H).

**<sup>13</sup>C NMR (101 MHz, Methanol-*d*<sub>4</sub>):** δ 179.8, 175.6, 158.4, 145.3, 145.3, 142.6, 128.8, 128.2, 126.3, 120.9, 69.9, 68.1, 52.3, 37.6.

**[α]<sub>D</sub><sup>23</sup>** = +3.1° (*c* = 1.0, MeOH)

**HRMS (ESI-TOF):** calcd for C<sub>20</sub>H<sub>20</sub>N<sub>2</sub>NaO<sub>6</sub><sup>+</sup> ([M+Na]<sup>+</sup>) 407.1214, found 407.1217.

#### *TBS protection of Fmoc 4-OH-Gln*

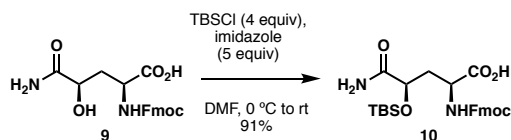

To a solution of **9** (45 mg, 0.117 mmol, 1.0 equiv) in 2 ml of DMF was sequentially added imidazole (40 mg, 0.585 mmol, 5.0 equiv) and TBSCl (71 mg, 0.468 mmol, 4.0 equiv) at 0 °C. The mixture was stirred at 0 °C to rt overnight and quenched by 1 M HCl until pH ~2–3. The aqueous layer was extracted with EtOAc (3 x 15 mL) and the combined organic extracts were washed with H<sub>2</sub>O (10 mL) and sat aq. NaCl (3 x 10 mL), dried over Na<sub>2</sub>SO<sub>4</sub> and concentrated in vacuo. Purification by silica gel chromatography (5:1 hexanes:EtOAc with 0.5% AcOH to 1:1 hexanes:EtOAc with 0.5% AcOH) gave **10** as a white foam (53 mg, 91%).

**<sup>1</sup>H NMR (400 MHz, Methanol-*d*<sub>4</sub>):** δ 7.79 (d, *J* = 7.4 Hz, 2H), 7.68 (d, *J* = 7.5 Hz, 2H), 7.38 (t, *J* = 7.4 Hz, 2H), 7.31 (tt, *J* = 7.4, 1.5 Hz, 2H), 4.50 (brs, 1H), 4.37 – 4.25 (m, 3H), 4.21 (t, *J* = 6.9 Hz, 1H), 2.41 – 2.23 (m, 1H), 2.22 – 2.11 (m, 1H), 0.96 (s, 9H), 0.15 (d, *J* = 11.3 Hz, 6H).

**<sup>13</sup>C NMR (101 MHz, Methanol-*d*<sub>4</sub>):** δ 145.2, 142.5, 128.8, 128.2, 126.3, 120.9, 72.0, 68.1, 38.1, 30.7, 26.27, 19.0, -4.9, -5.2.

**[α]<sub>D</sub><sup>23</sup>** = +1.5° (*c* = 1.0, MeOH)

**HRMS (ESI-TOF):** calcd for C<sub>26</sub>H<sub>35</sub>N<sub>2</sub>O<sub>6</sub>Si<sup>+</sup> ([M+H]<sup>+</sup>) 499.2259, found 499.2278.

### Synthesis of compound 11

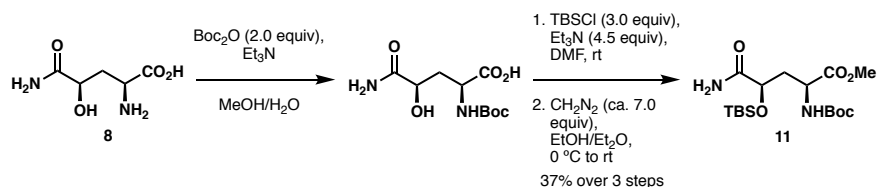

A previous procedure for the derivatization of 4-OH-Cit was adapted for this synthesis.<sup>3</sup> To a suspension of 4-OH-Gln (89 mg, 0.55 mmol, 1.0 equiv, obtained from reaction with purified Q4Ox) in 4:1 MeOH:H<sub>2</sub>O (4 ml) was added Et<sub>3</sub>N (0.4 mL). Boc<sub>2</sub>O (240 mg, 1.10 mmol, 2.0 equiv) was added in a single portion and the mixture was stirred at room temperature for 16 h. The mixture was concentrated *in vacuo* and azeotroped a few times with toluene to remove residual water and the resulting crude material was taken to the next step without further purifications.

The crude material was dissolved in DMF (1.5 mL), followed by addition of Et<sub>3</sub>N (0.34 mL, 2.48 mmol, 4.5 equiv) and TBSCl (249 mg, 1.65 mmol, 3.0 equiv). After stirring for 24 h, EtOAc (10 mL) and H<sub>2</sub>O (1.5 mL) were added, followed by 1 M HCl until a pH of 1–2 was reached. The aqueous layer was extracted with EtOAc (2 x 10 mL) and the combined organic extracts were washed with H<sub>2</sub>O (5 mL) and sat aq. NaCl (2 x 10 mL), dried over Na<sub>2</sub>SO<sub>4</sub> and concentrated *in vacuo*.

Diazomethane was generated from N-Me-nitroso-urea (400 mg, 3.88 mmol) following a previously reported procedure.<sup>4</sup> The crude acid was dissolved in Et<sub>2</sub>O (5.0 mL) and EtOH (0.5 mL) (0.1 M final concentration) and the resulting solution was cooled to 0 °C. Diazomethane (in ~ 10 mL Et<sub>2</sub>O, stored at 0 °C) was added portion-wise and the resulting mixture was allowed to stir at 0 °C for 2 h, then at room temperature for 3 h. AcOH was added dropwise until the reaction went from yellow to colorless. The solution was subsequently concentrated *in vacuo* and the crude material was purified by silica gel chromatography (gradient: 1:4 EtOAc:hexanes to 3:7 EtOAc:hexanes) to provide 79 mg of **11** as a white foam with minor TBS–OH impurities.

**<sup>1</sup>H NMR (400 MHz, Methanol-*d*<sub>4</sub>):**  $\delta$  6.56 (s, 1H), 4.36 – 4.27 (m, 1H), 4.24 (q,  $J = 5.3, 4.5$  Hz, 1H), 3.72 (s, 3H), 2.25 – 2.04 (m, 2H), 0.96 (s, 9H), 0.16 (d,  $J = 16.9$  Hz, 6H).

**<sup>13</sup>C NMR (101 MHz, Methanol-*d*<sub>4</sub>):**  $\delta$  181.7, 174.6, 157.9, 80.8, 72.5, 52.8, 51.3, 37.4, 28.7, 26.3, 18.9, -4.8, -5.1.

**$[\alpha]_D^{23} = -4.7^\circ$**  ( $c = 1.0$ , MeOH)

**HRMS (ESI-TOF):** calcd for C<sub>17</sub>H<sub>35</sub>N<sub>2</sub>O<sub>6</sub>Si<sup>+</sup> ( $[\text{M}+\text{H}]^+$ ) 391.2259, found 391.2287.

### Synthesis of Gln-SNac

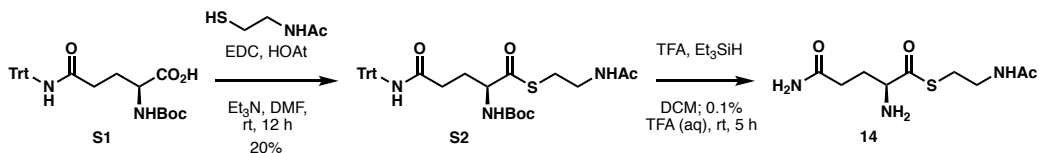

Gln-SNac was prepared by modifying a previously reported literature procedure for the synthesis of CoA-S-Glu.<sup>5</sup> **S1** (145 mg, 0.296 mmol, 1.0 equiv), N-acetylcysteamine (35 mg, 0.296 mmol, 1.0 equiv), EDC (108 mg, 0.592 mmol, 2.0 equiv) and HOAt (81 mg, 0.592 mmol, 2.0 equiv) were dissolved in 1.0 mL of DMF. Triethylamine (124  $\mu$ L, 0.888 mmol, 3.0 equiv) was added dropwise and the reaction mixture was stirred overnight at room temperature. Following addition of sat. aq. NaHCO<sub>3</sub>, the mixture was extracted with EtOAc twice and the combined organic extracts were washed with sat. aq. NaCl. Purification by flash column chromatography (7:3 hexanes:EtOAc to pure EtOAc) afforded protected Gln-SNac (**S2**, 35 mg, 20% yield). Deprotection of **S2** was performed according to a previously reported literature procedure using a combination of TFA (10 equiv) and Et<sub>3</sub>SiH (5 equiv) in DCM at rt, followed by dissolution in 0.1% v/v aq. TFA solution. After 5 h, the mixture was centrifuged (4,000 rpm, 10 min) and the supernatant was collected and concentrated. Purification by preparative HPLC (gradient: 100% H<sub>2</sub>O to 90:5:5 H<sub>2</sub>O:MeOH:MeCN over 13 min then hold 90:5:5 H<sub>2</sub>O:MeOH:MeCN for 2 min) provided product that was deemed to be sufficiently pure by <sup>1</sup>H NMR and LCMS for subsequent enzymatic reaction with GloE and Q4Ox.

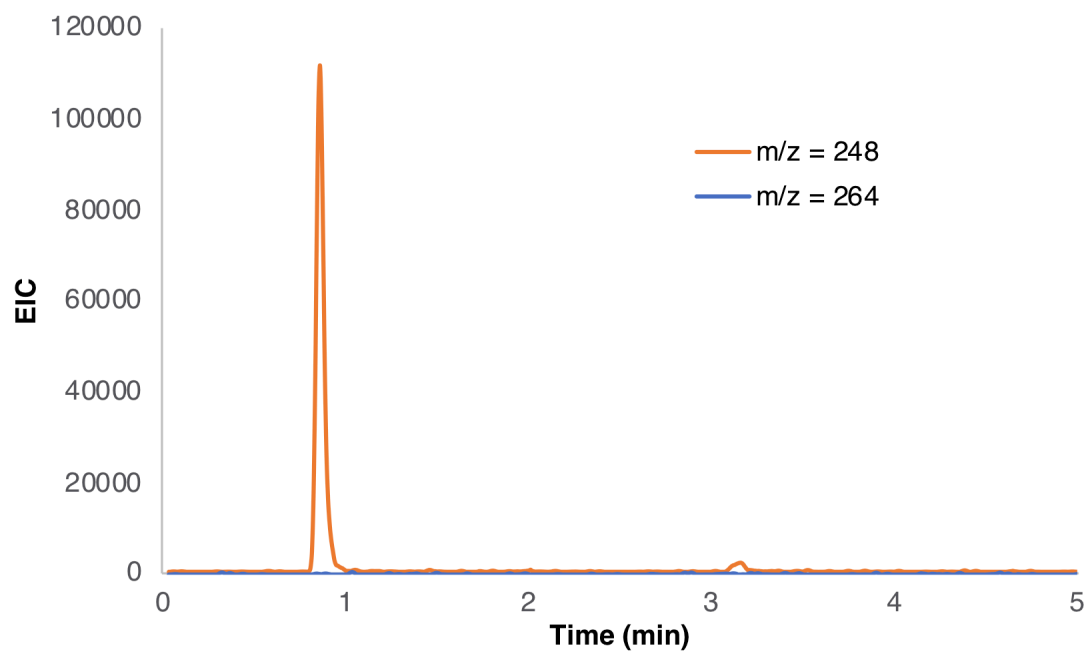

**Figure S2.** LCMS trace of Gln-SNAc hydroxylation with purified GloE.  $m/z$  (Gln-SNAc,  $[M+H^+]$ ) = 248,  $m/z$  (3-OH-Gln-SNAc,  $[M+H^+]$ ) = 264.

## References

1. Cardani, S.; Prati, L.; Tinti, O. *Synthesis* **1986**, 1032–1035.
2. Ajish Kumar, K. S.; Chattopadhyay, S. *RSC Adv.* **2015**, *5*, 19455–19464.
3. Zwick, C. R., III; Sosa, M. B.; Renata, H. *J. Am. Chem. Soc.* **2021**, *143*, 1673–1679.
4. Prechter, A.; Heinrich, M. R. *Synthesis* **2011**, *10*, 1515–1525.
5. Strieker, M.; Nolan, E. M.; Walsh, C. T.; Marahiel, M. A. *J. Am. Chem. Soc.* **2009**, *131*, 13523–13530.

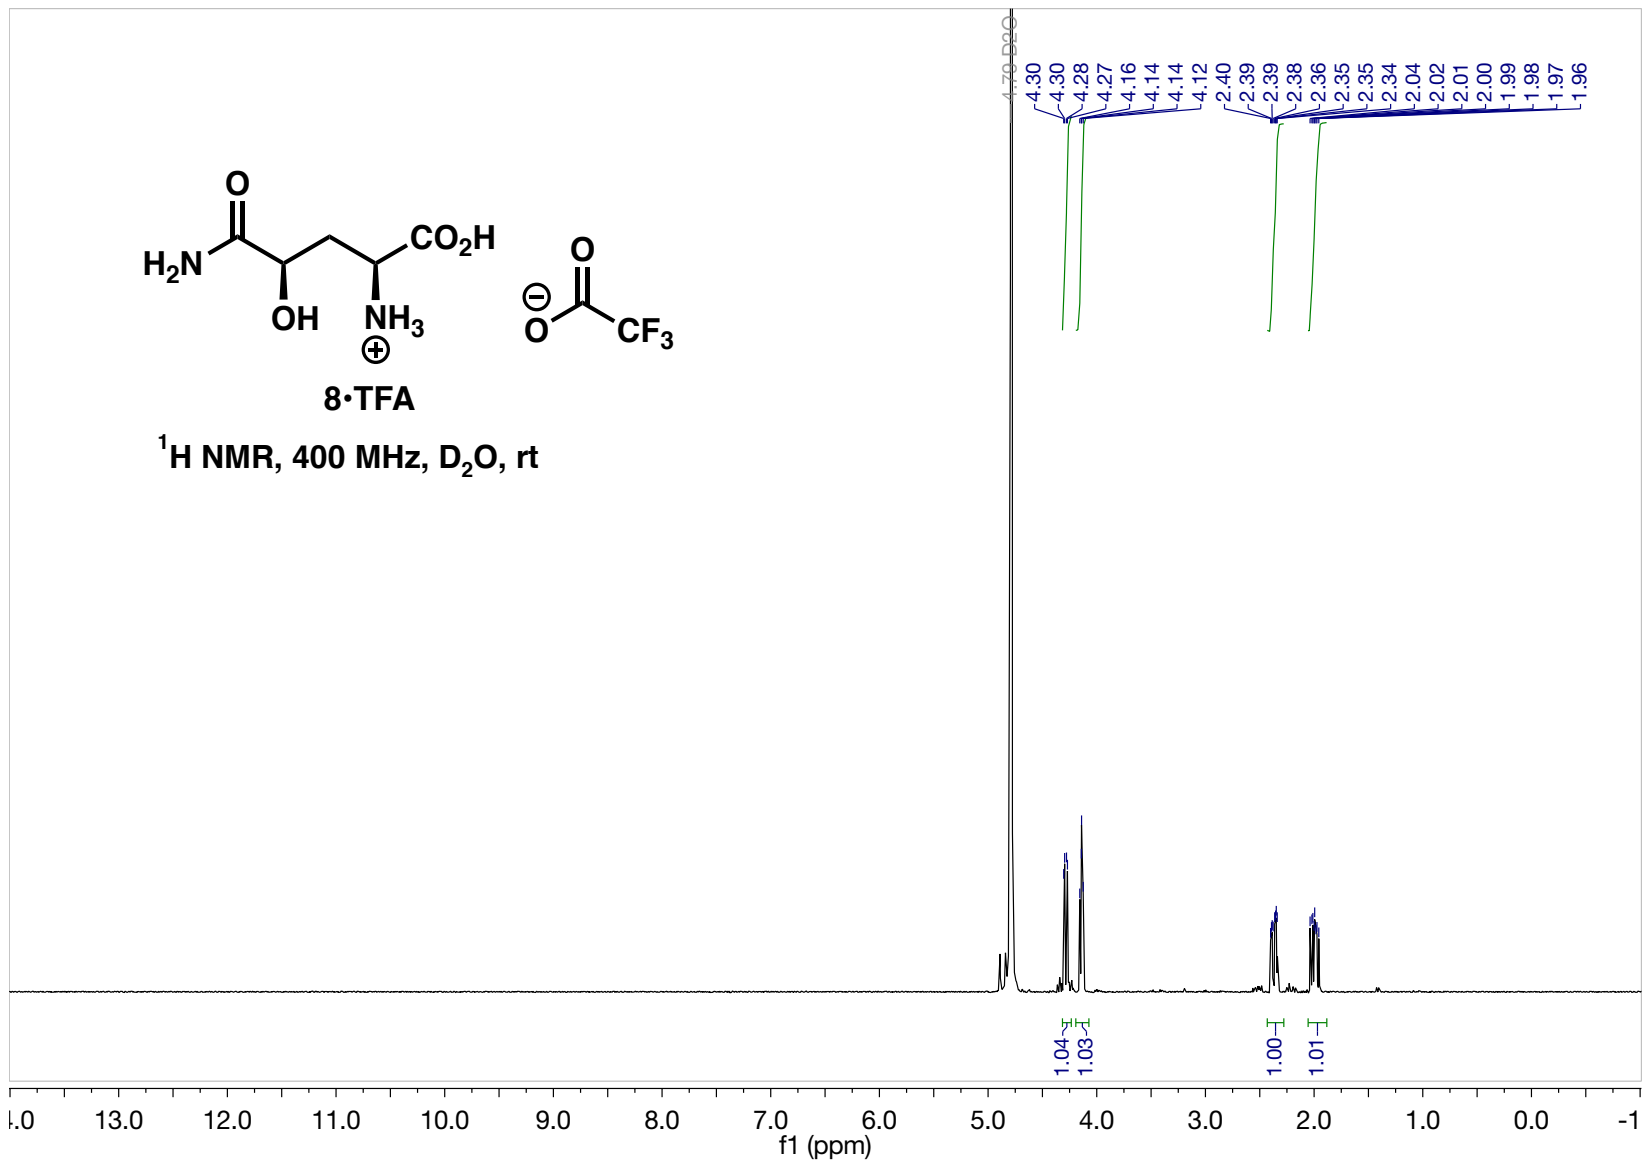

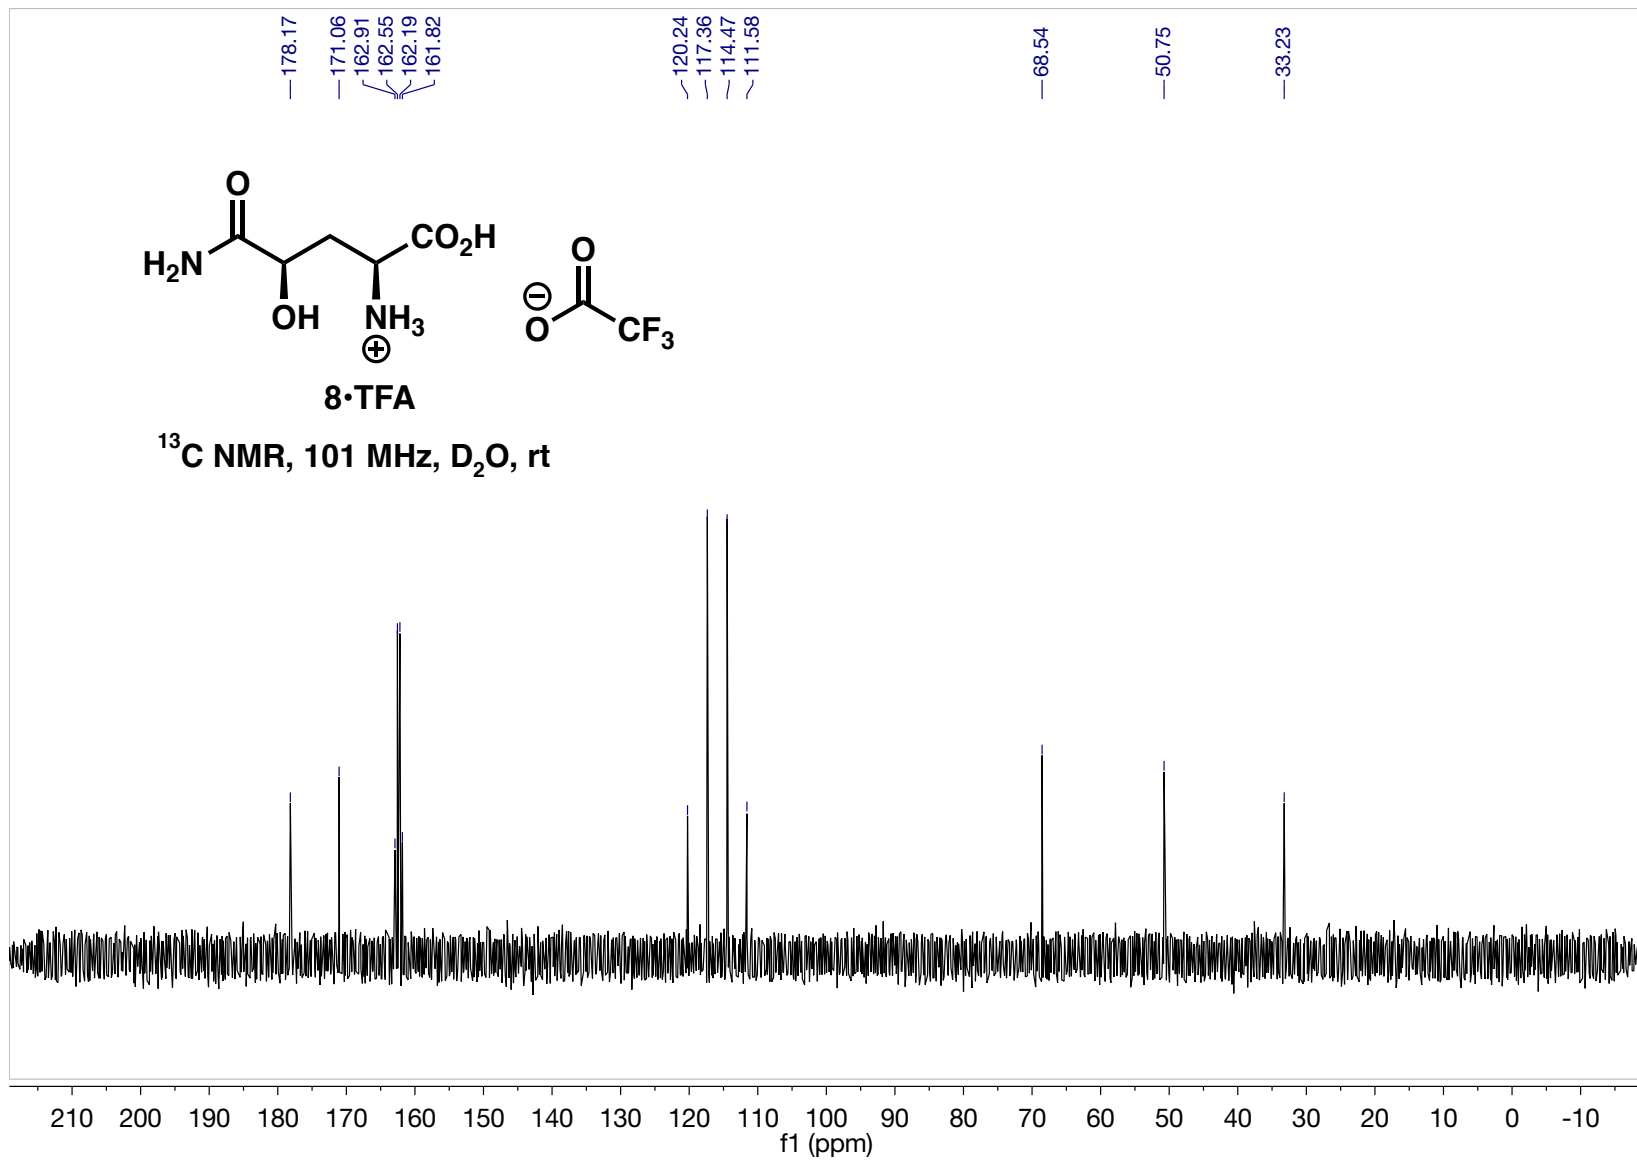

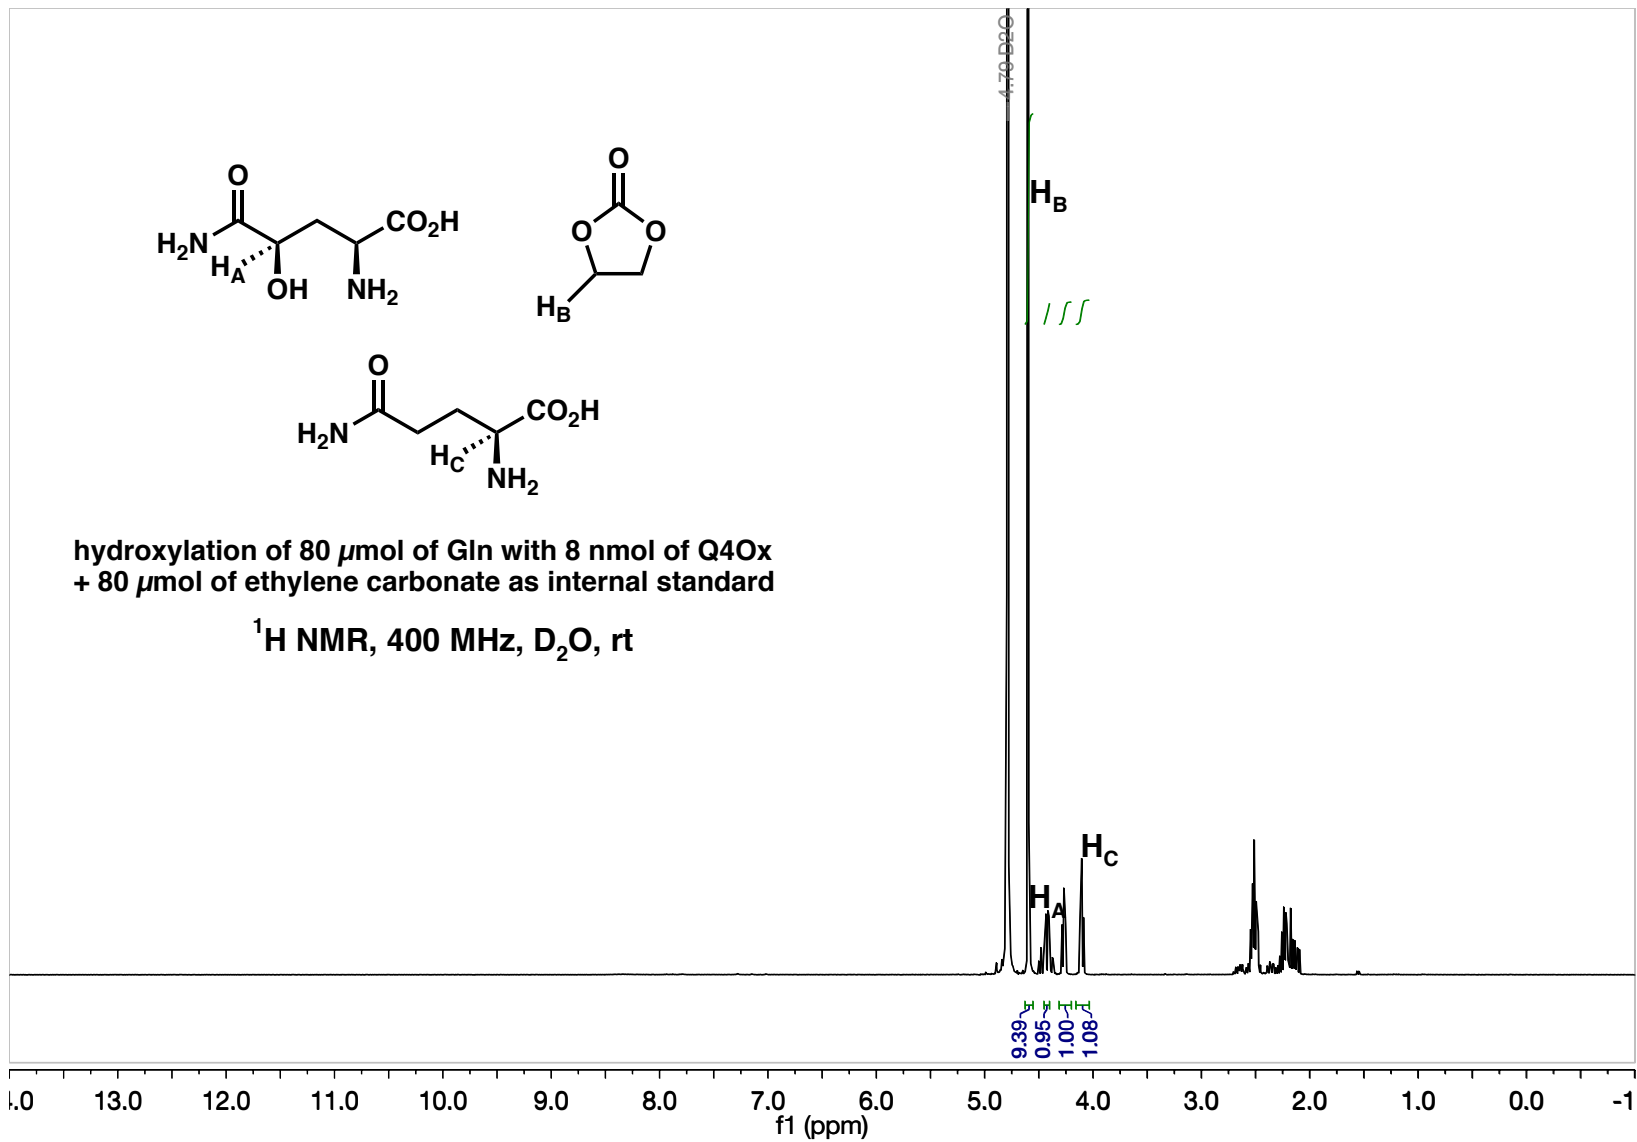

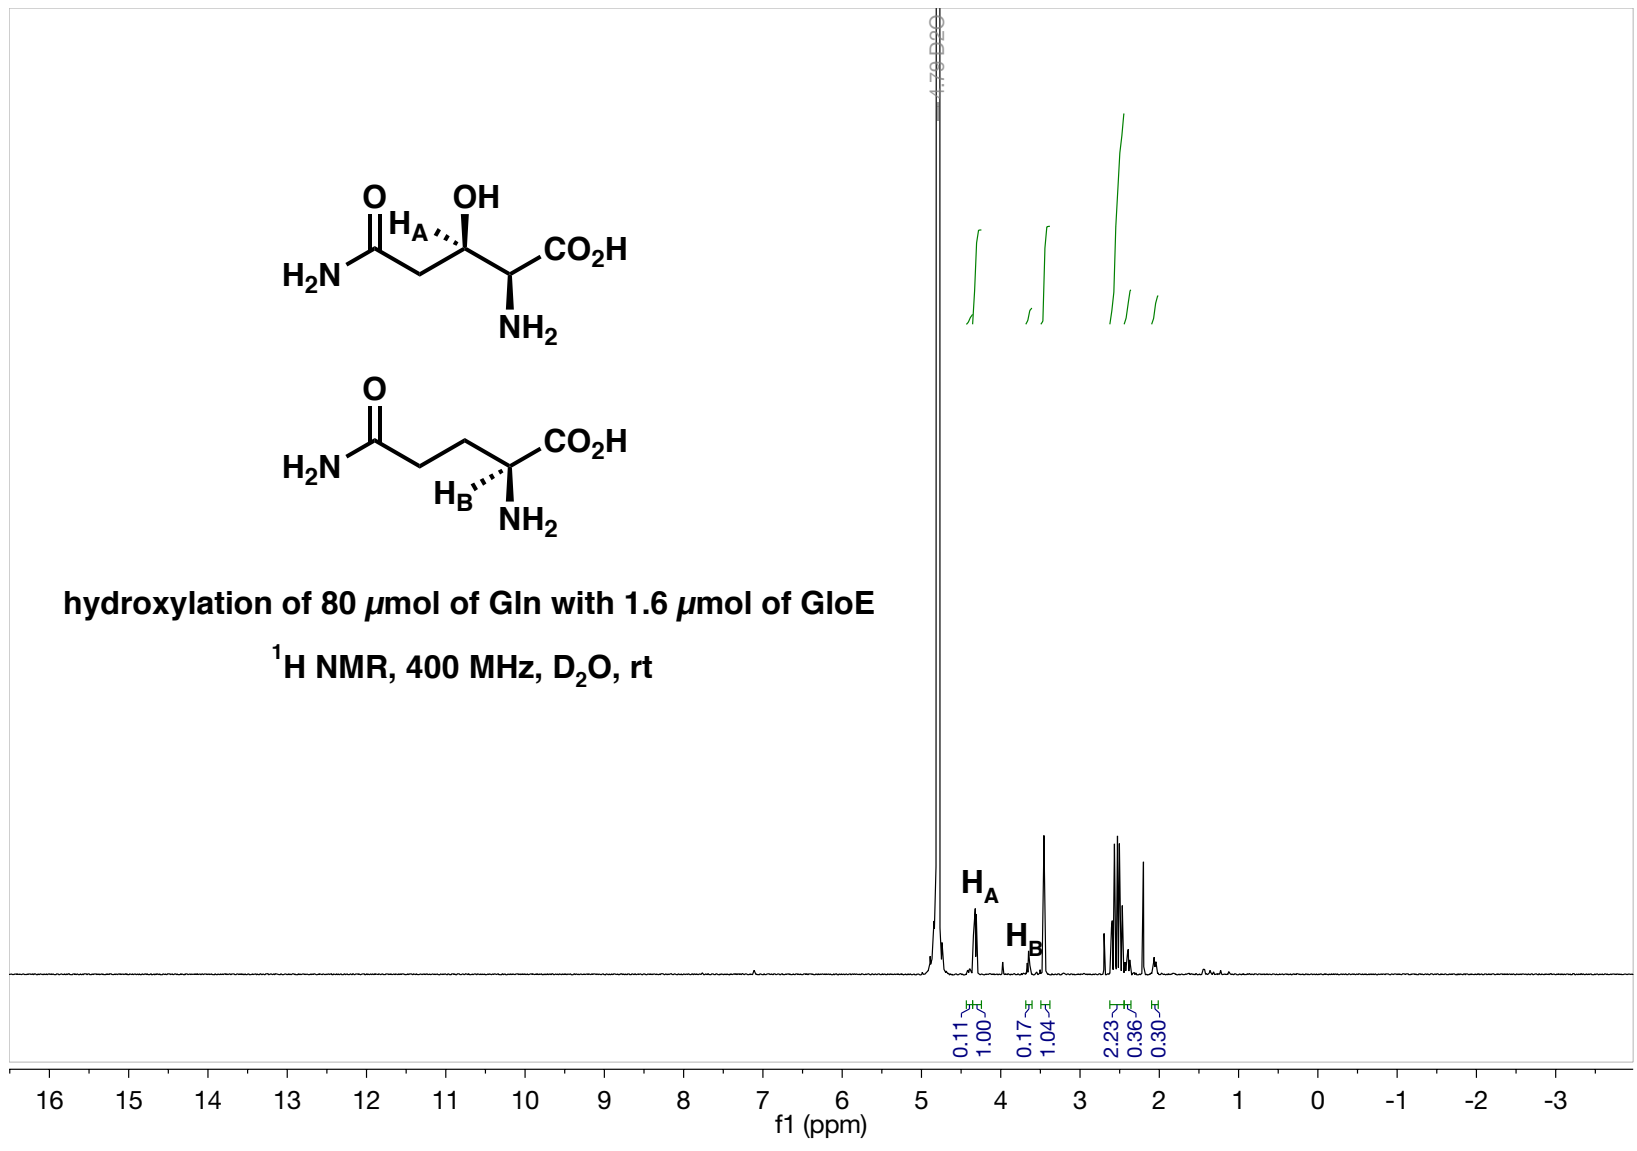



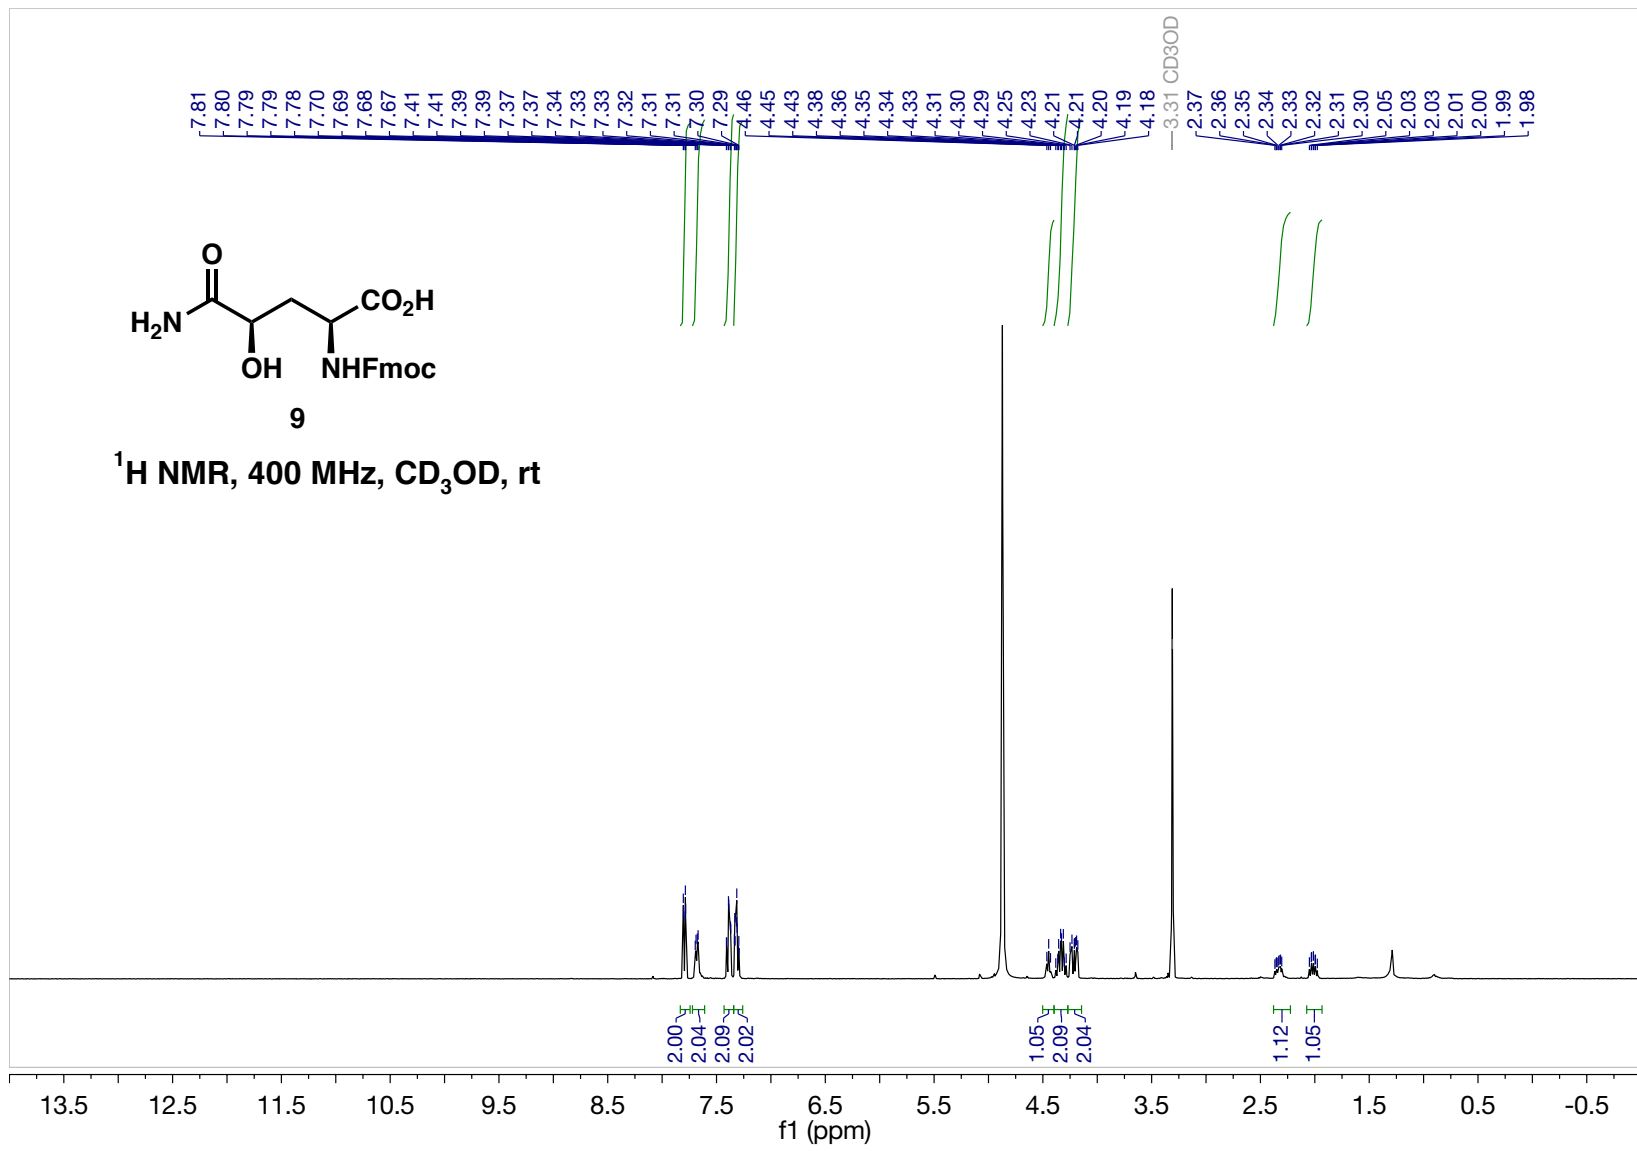

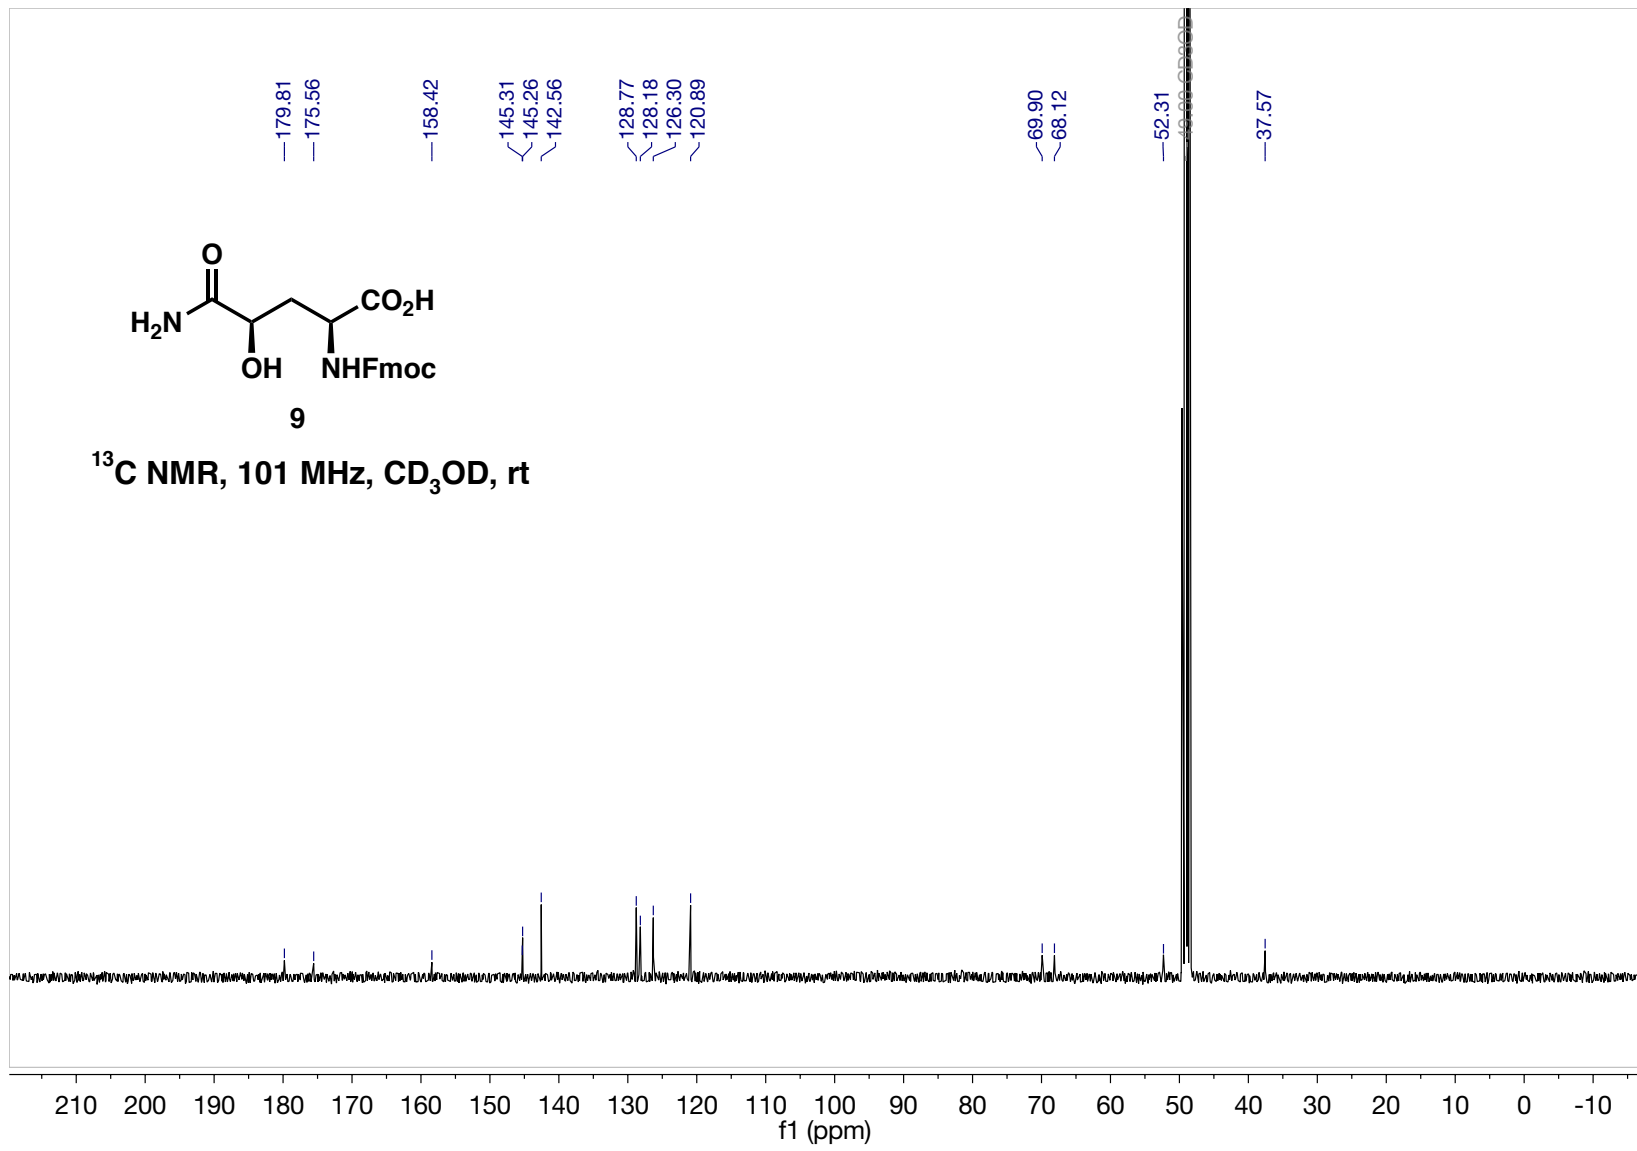



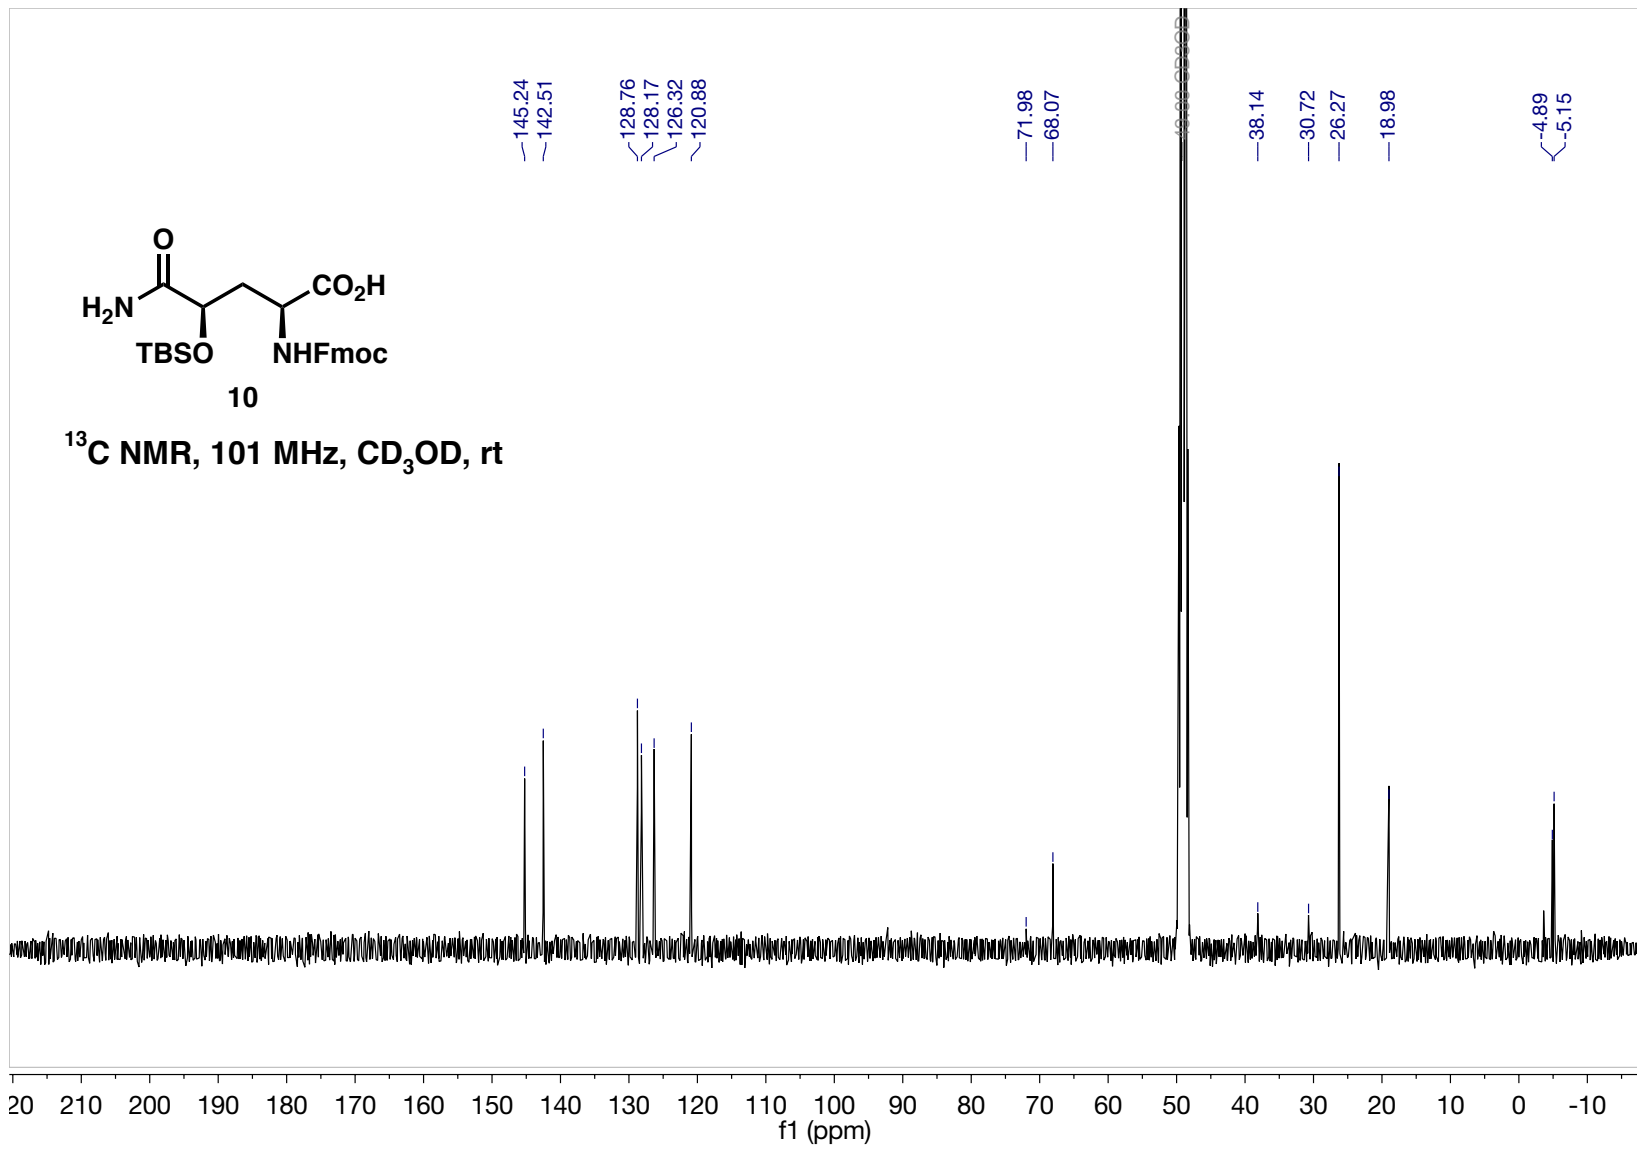

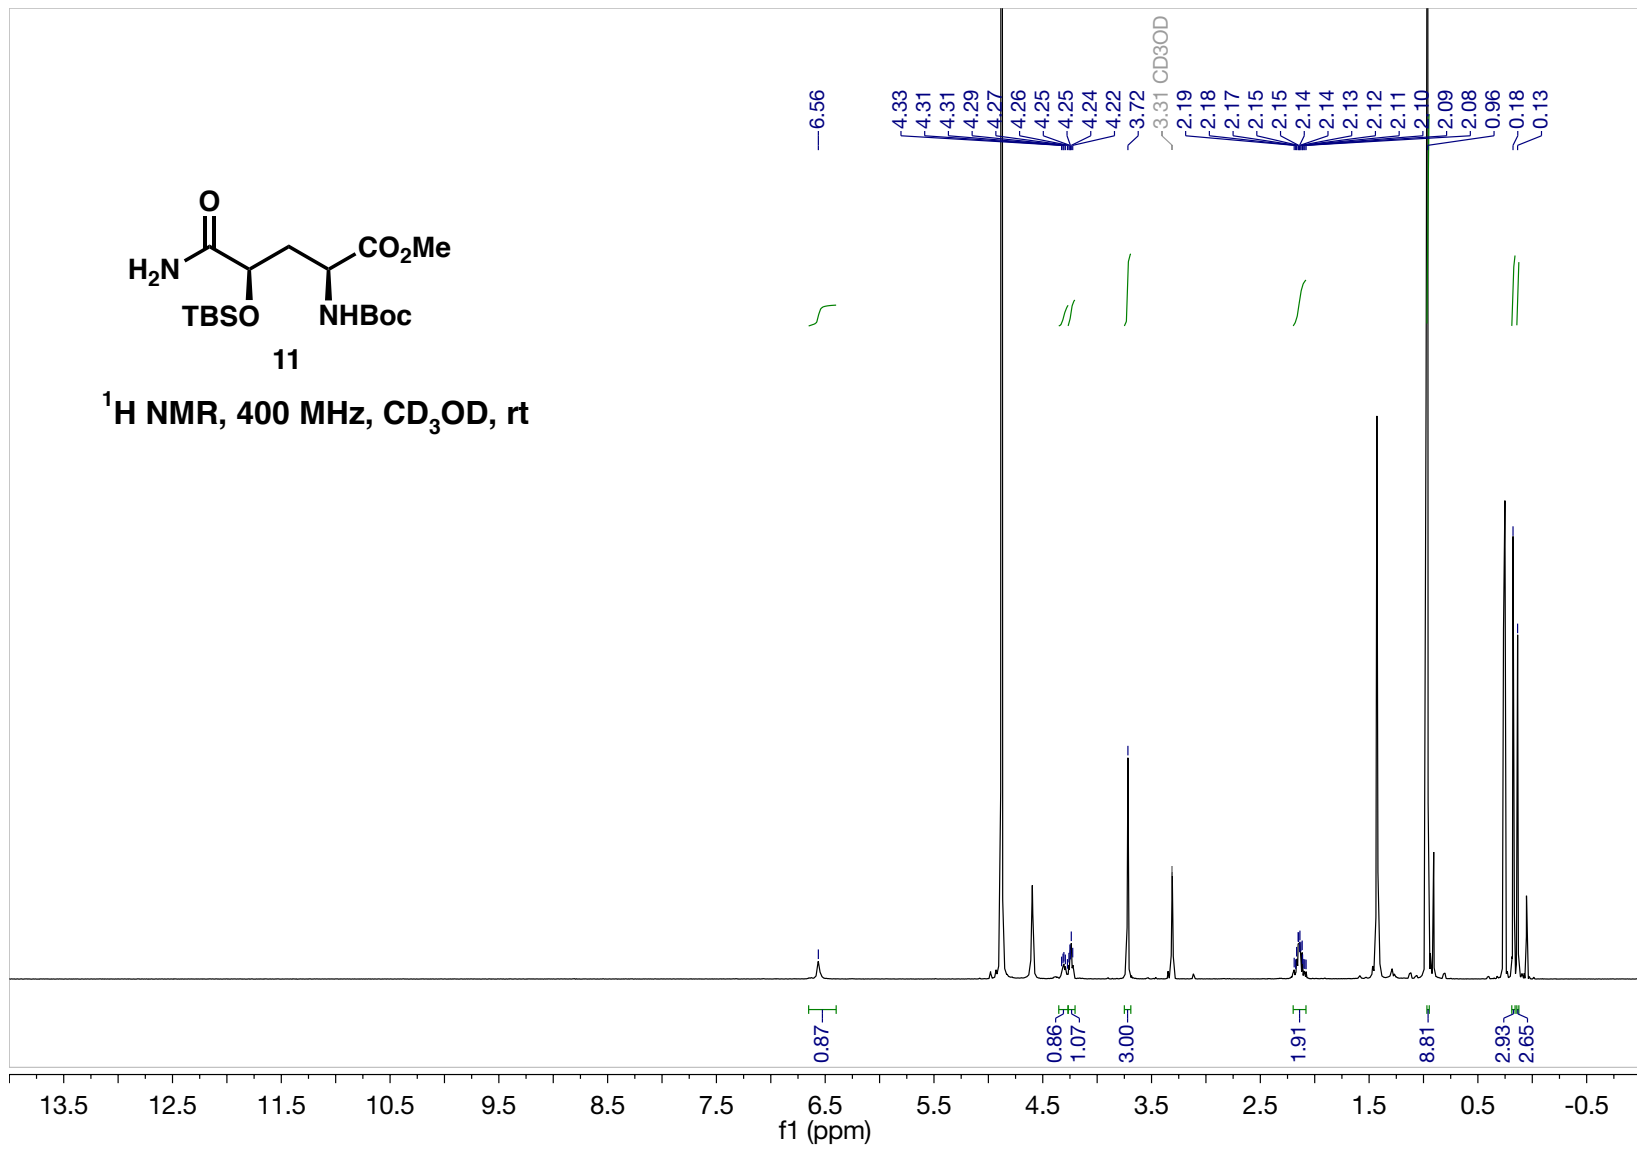

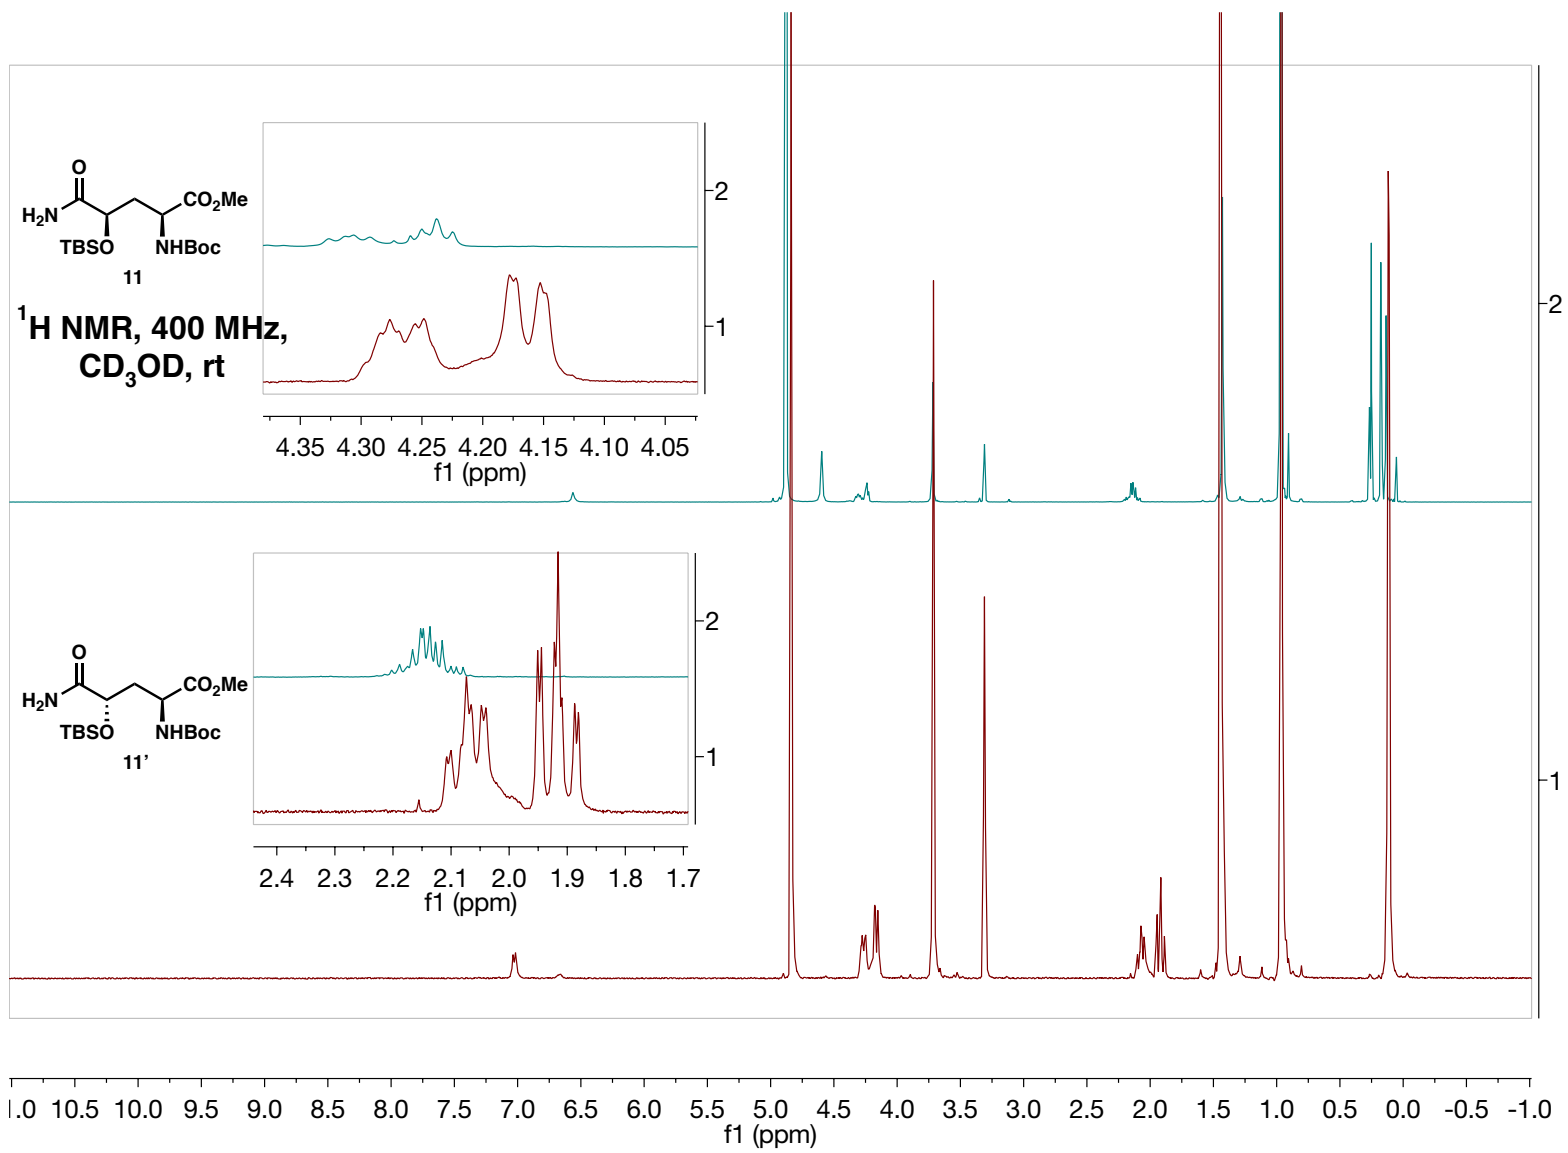

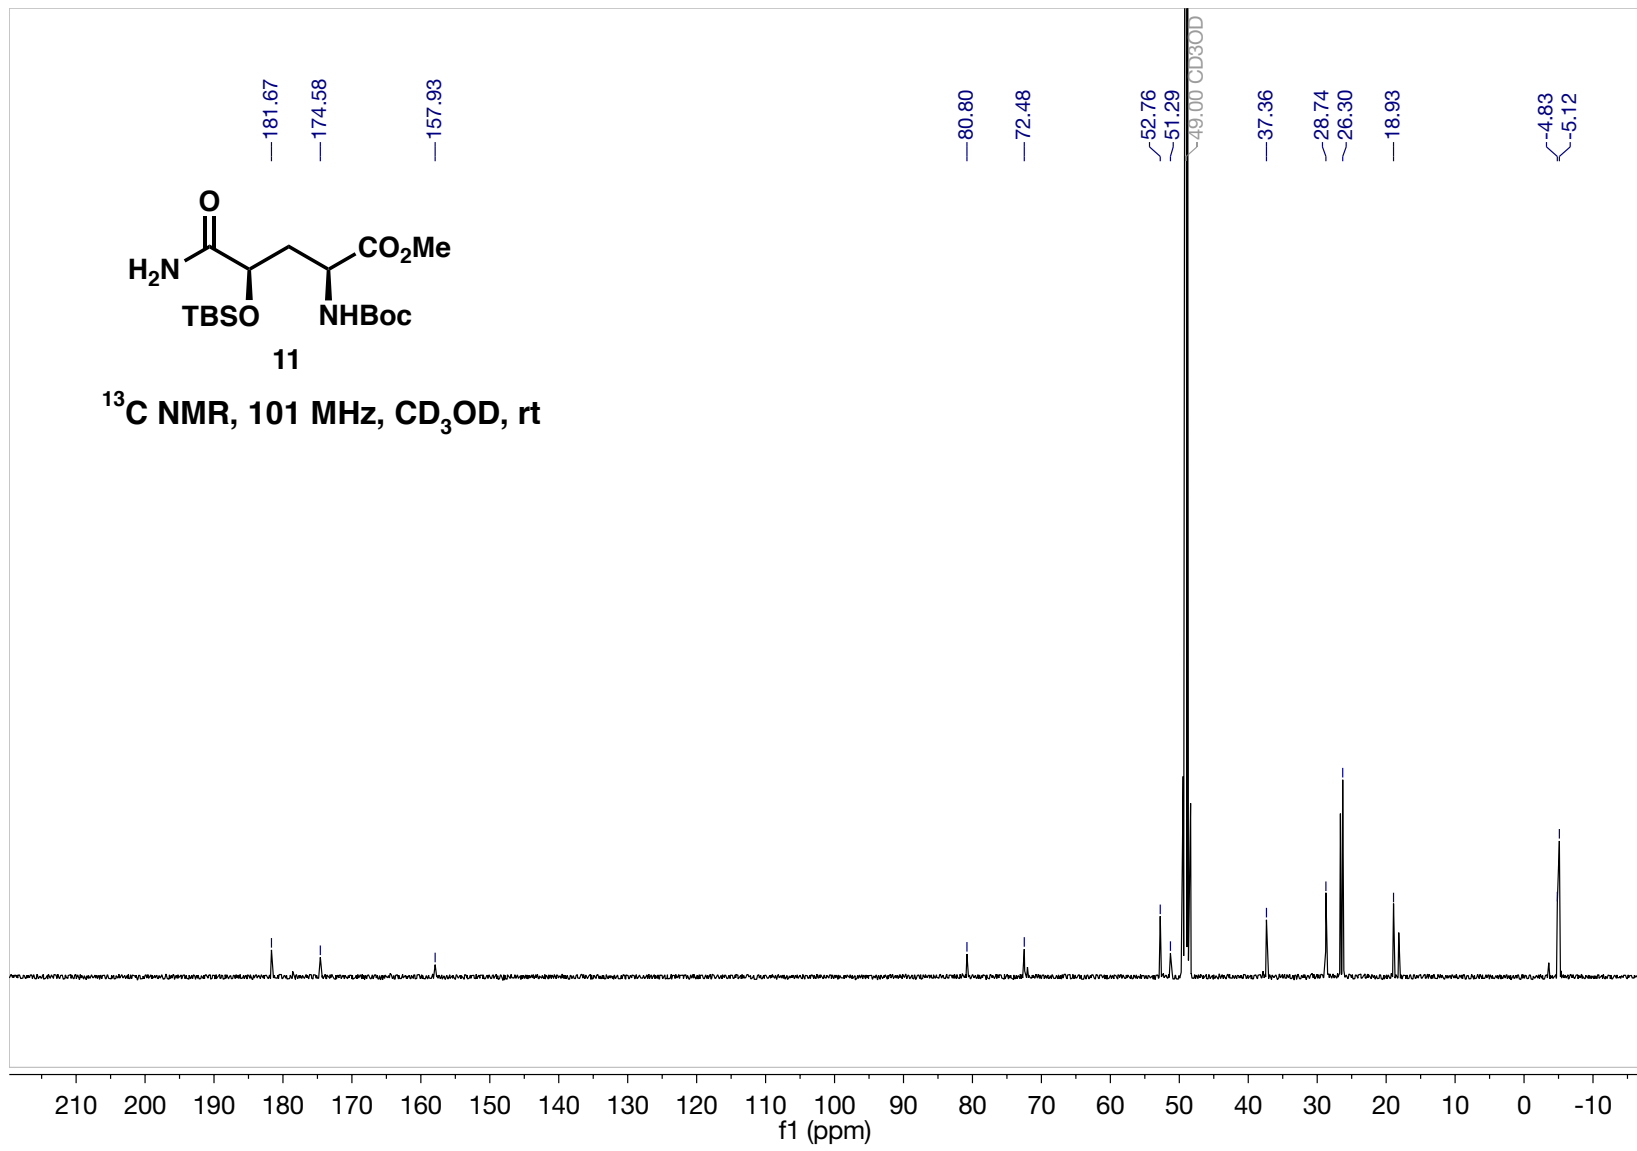

Supplement: NIHMS1701949-supplement-1.pdf [file NIHMS1701949-supplement-1.pdf]
